# Supplementary material for: Dialysis based-culture medium conditioning improved the generation of human induced pluripotent stem cell derived-liver organoid in a high cell density
Source: Springer Nature journal article supplement (doi:10.1038/s41598-022-25325-9), 2022-12-01
Supplement: MOESM1 [file 41598_2022_25325_MOESM1_ESM.pdf]

**Supplementary figure 1.** Comparison between hepatic differentiation in monolayer (2D), suspension culture (3D), and suspension culture with viscoelastic gellan gum biopolymer FP001 (3D + GG). The exclusion of viscoelastic biopolymer FP001 in culture medium was relatively increase the cell production (a); relatively similar CYP3A4 (b), and significantly higher ALB (c). All hiPSCs differentiated in 3D showed a significantly lower cholangiocyte marker CK19, compared to the one differentiated in monolayer (d). (The data obtained from at least 3 biologically independent experiments; n 2D = 3; n 3D = 6; and n 3D+GG = 6). Statistical significance: \* $p < 0.05$ ; \*\*\*\* $p < 0.0001$ .

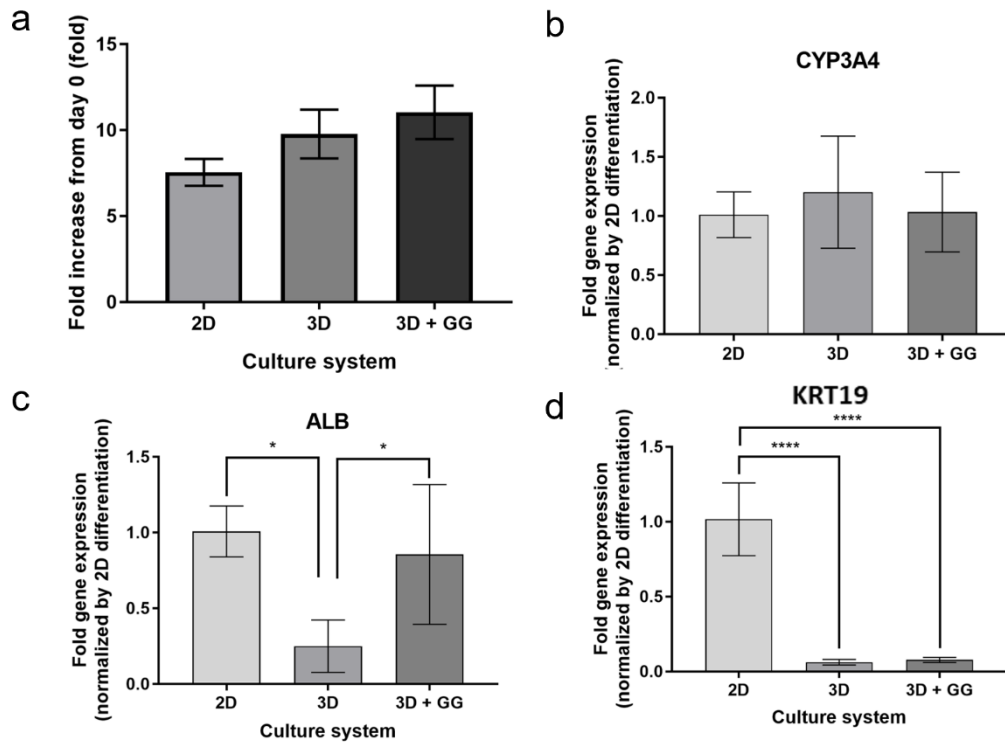

**Supplementary figure 2.** The optimization of daily HGF and OSM using different concentration. (a) The addition of albumin or FBS were essential to preserve the degradation of HGF and OSM in cell free condition. (b) The optimization of the HGF and OSM concentration in the last stage of differentiation in D/HD. (n=4 biologically independent experiments). Statistical significance: \* $p < 0.05$ ; \*\* $p < 0.01$ ; \*\*\* $p < 0.001$ ; \*\*\*\* $p < 0.0001$ .

**a**

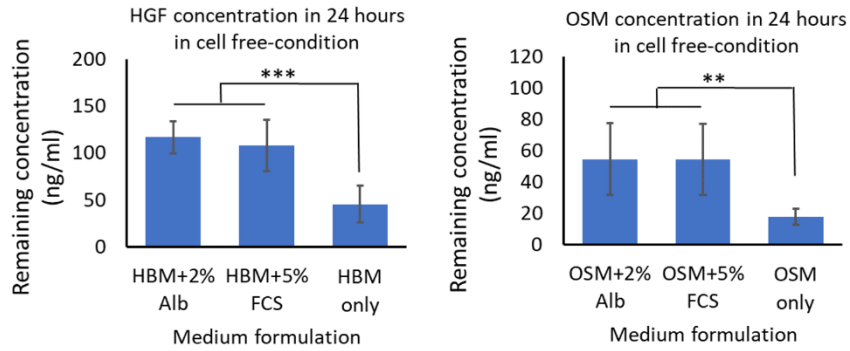

**b**

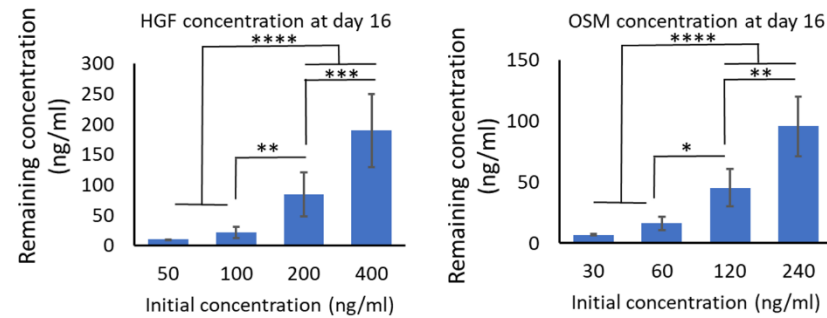

**Supplementary figure 3.** Approximate cost production of hepatic cells using each culture configuration. The D/HD showed significantly less exogenous growth factors requirement per million cells during HLOs production (a). This high efficiency in D/HD impacting its cost savings by improving cost production efficiency. This configuration becoming the cheapest HLOs generation strategy among the culture system, while forcing the high-density culture in conventional medium replacement system (C/HD) showed a slightly higher cost production than performing differentiation in the same culture system using low cell density (C/LD) (b). The calculation was based on exogenous growth factors and basal medium usage and their price in September 2021 (n = 4 biologically independent experiments). Mean  $\pm$  standard deviation is indicated in each graph. Statistical significance: \*\*p < 0.01; ns: not significant.

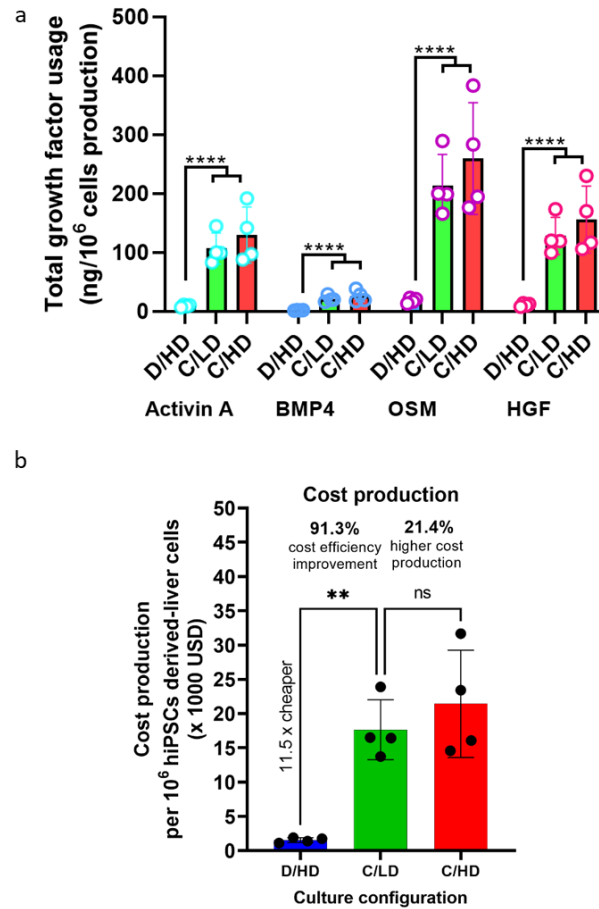

**Supplementary table 1.** The primer sequence used in this study.

| Gene target | Forward primer         | Reverse primer         |
|-------------|------------------------|------------------------|
| CYP3A4      | ACATAGCCCAGCAAAGAGCAAC | GTCTGGGATGAGAGCCATCACT |
| ALB         | CCTGCTGACTTGCCTTCATTAG | TGGCATAGCATTTCATGAGGA  |
| KRT19       | GCCACTACTACACGACCATCCA | AGAGCCTGTTCCGTCTCAAAC  |

**Supplementary table 2.** The antibodies used for ELISA and immunocytochemistry analysis

| Antibodies / kit                                                   | Analysis            | Information |                |
|--------------------------------------------------------------------|---------------------|-------------|----------------|
|                                                                    |                     | Catalog no. | Manufacturer   |
| Sheep Anti human Cytokeratin 19                                    | Immunocytochemistry | AF3506SP    | R&D Biosystems |
| Goat Anti human Albumin                                            | Immunocytochemistry | A80-129A    | Bethyl         |
| Rat anti-human Cytokeratin 7 Antibody, Alexa Fluor® 647 conjugated | Immunocytochemistry | 601607      | Biolegend      |
| Rabbit Anti-Sheep IgG Alexa Fluor® 555                             | Immunocytochemistry | ab150182    | Abcam          |
| Donkey Anti-Goat IgG Alexa Fluor® 488                              | Immunocytochemistry | ab150129    | Abcam          |
| DAPI                                                               | Immunocytochemistry | 340-07971   | Dojindo        |
| Human HGF Quantikine                                               | ELISA               | DHG00B      | R&D Biosystems |
| Human OSM DuoSet                                                   | ELISA               | DY295       | R&D Biosystems |
| Human Activin A DuoSet                                             | ELISA               | DY338       | R&D Biosystems |
| Human BMP4 DuoSet                                                  | ELISA               | DY314       | R&D Biosystems |
